# Supplementary material for: Diagnostic Performances of the ACR-TIRADS System in Thyroid Nodules Triage: A Prospective Single Center Study
Source: MDPI journal article supplement (doi:10.3390/cancers13092230), 2021-05-06
Supplement: s1 [file s1]

# Supplementary Material: Diagnostic Performances of the ACR-TIRADS System in Thyroid Nodules Triage: A Prospective Single Center Study

Davide Leni, Davide Seminati, Davide Fior, Francesco Vacirca, Giulia Capitoli, Laura Cazzaniga, Camillo Di Bella, Vincenzo L'Imperio, Stefania Galimberti and Fabio Pagni

**Table S1.** Correlation of the histological cancer subtype, local tumor staging (pTNM, following the AJCC 8th edition), US-ACR and cytological classes (according to SIAPEC/Bethesda classifications) of the subset of cases submitted to surgery with a final diagnosis of malignancy (34/49, 70%).

| N. | Histology | pTNM | ACR Classes | Cytology (SIAPEC/Bethesda) |
|----|-----------|------|-------------|----------------------------|
| 1  | EFVPTC    | pT3a | 3           | TIR3B/IV                   |
| 2  | EFVPTC    | pT1b | 5           | TIR3B/IV                   |
| 3  | EFVPTC    | pT1b | 3           | TIR3A/III                  |
| 4  | PTC       | pT2  | 5           | TIR3A/III                  |
| 5  | PTC       | pT1b | 4           | TIR3B/IV                   |
| 6  | PTC       | pT1a | 5           | TIR3B/IV                   |
| 7  | PTC       | pT1a | 4           | TIR4/V                     |
| 8  | PTC       | pT1b | 3           | TIR4/V                     |
| 9  | PTC       | pT1b | 4           | TIR4/V                     |
| 10 | PTC       | pT1b | 4           | TIR4/V                     |
| 11 | PTC       | pT3a | 5           | TIR4/V                     |
| 12 | PTC       | pT1a | 3           | TIR4/V                     |
| 13 | PTC       | pT1b | 4           | TIR4/V                     |
| 14 | PTC       | pT2  | 4           | TIR4/V                     |
| 15 | PTC       | pT1b | 5           | TIR4/V                     |
| 16 | PTC       | pT1b | 5           | TIR5/VI                    |
| 17 | PTC       | pT1b | 5           | TIR5/VI                    |
| 18 | PTC       | pT1b | 5           | TIR5/VI                    |
| 19 | PTC       | pT2  | 5           | TIR5/VI                    |
| 20 | PTC       | pT1b | 5           | TIR5/VI                    |
| 21 | PTC       | pT1b | 4           | TIR5/VI                    |
| 22 | PTC       | pT1b | 4           | TIR5/VI                    |
| 23 | PTC       | pT1b | 5           | TIR5/VI                    |
| 24 | PTC       | pT1a | 4           | TIR5/VI                    |
| 25 | PTC       | pT1b | 5           | TIR5/VI                    |
| 26 | PTC       | pT1b | 5           | TIR5/VI                    |
| 27 | PTC       | pT1a | 5           | TIR5/VI                    |

|    |                                           |      |   |          |
|----|-------------------------------------------|------|---|----------|
| 28 | PTC                                       | pT1b | 5 | TIR5/VI  |
| 29 | PTC                                       | pT1b | 5 | TIR5/VI  |
| 30 | PTC                                       | pT1b | 3 | TIR5/VI  |
| 31 | Minimally invasive Hurthle cell carcinoma | pT1b | 5 | TIR3B/IV |
| 32 | Medullary carcinoma                       | pT1a | 4 | TIR4/V   |
| 33 | Anaplastic carcinoma                      | pT3b | 5 | TIR5/VI  |
| 34 | Spindle cell melanoma metastasis          | /    | 4 | TIR5/VI  |

PTC: papillary thyroid carcinoma. EFVPTC: encapsulated follicular variant of PTC.

**Table S2.** Description of the evaluation made by two radiologists of the same 17 nodules.

|                       | N° of Discordant Cases | First Assessment | Second Assessment |
|-----------------------|------------------------|------------------|-------------------|
| ACR class             | 7/17                   |                  |                   |
| detailed disagreement | 1/17                   | 2                | 3                 |
| -                     | 1/17                   | 3                | 1                 |
| -                     | 2/17                   | 3                | 4                 |
| -                     | 1/17                   | 4                | 3                 |
| -                     | 1/17                   | 5                | 1                 |
| -                     | 1/17                   | 5                | 4                 |
| Ultrasound features   |                        |                  |                   |
| Composition           | 3/17                   |                  |                   |
| detailed disagreement | 1/17                   | 1                | 0                 |
| -                     | 1/17                   | 1                | 2                 |
| -                     | 1/17                   | 2                | 0                 |
| Echogenicity          | 8/17                   |                  |                   |
| detailed disagreement | 2/17                   | 1                | 2                 |
| -                     | 1/17                   | 2                | 0                 |
| -                     | 3/17                   | 2                | 1                 |
| -                     | 1/17                   | 2                | 3                 |
| -                     | 1/17                   | 3                | 2                 |
| Shape                 | 1/17                   | 3                | 0                 |
| Echogenic foci        | 2/17                   |                  |                   |
| detailed disagreement | 1/17                   | 1                | 0                 |
| -                     | 1/17                   | 3                | 1                 |

**Table S3.** Comparison of the classes and relative operative indications for the three most commonly used US-based TIRADS systems (ACR, EU and ATA) for the screening of thyroid nodules.

| ACR Classes | Final Indication ACR                               | EU Classes | Final Indication EU                         | ATA Classes | Final Indication ATA            |
|-------------|----------------------------------------------------|------------|---------------------------------------------|-------------|---------------------------------|
| ACR1        | No FNA                                             | EU1        | No FNA                                      | ATA1        | No FNA                          |
| ACR2        | No FNA                                             | EU2        | No FNA                                      | ATA2        | FNA or follow-up if $\geq 2$ cm |
| ACR3        | FNA if $\geq 2.5$ cm<br>Follow-up if $\geq 1.5$ cm | EU3        | FNA if $> 2$ cm                             | ATA3        | FNA if $\geq 1.5$ cm            |
| ACR4        | FNA if $\geq 1.5$ cm<br>Follow-up if $\geq 1$ cm   | EU4        | FNA if $> 1.5$ cm                           | ATA4        | FNA if $\geq 1$ cm              |
| ACR5        | FNA if $> 1$ cm<br>Follow-up if $\geq 0.5$ cm      | EU5        | FNA if $> 1$ cm<br>Follow-up if $\leq 1$ cm | ATA5        | FNA if $\geq 1$ cm              |

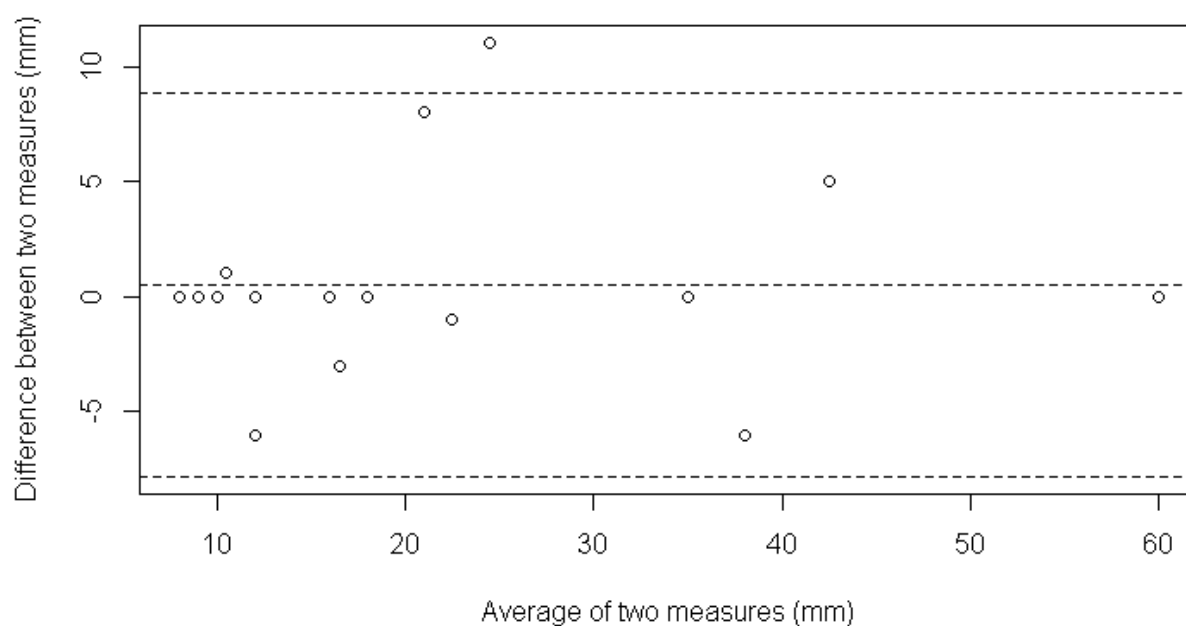**Figure S1.** The graph reports the differences in measures as assessed by the Bland-Altman analysis.
